# Supplementary material
Source: PubMed Central journal article supplement (PMC4441863)

# Bone Marrow

**A.** Live, Single,  
B220<sup>-</sup>, Ly6G<sup>-</sup>

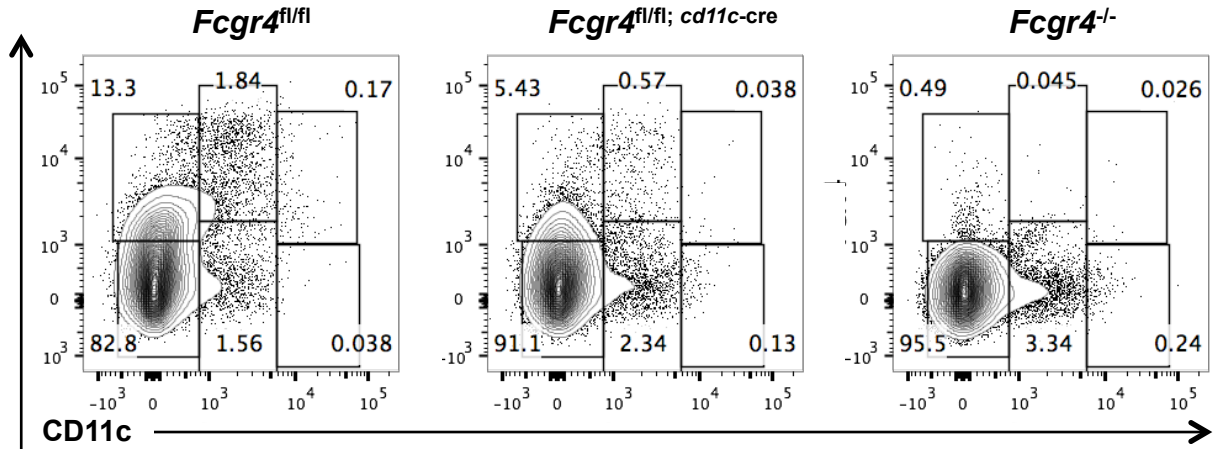

**B.** Live, Single,  
B220<sup>-</sup>, Ly6G<sup>-</sup>,  
CD11c<sup>int/-</sup>, CD11b

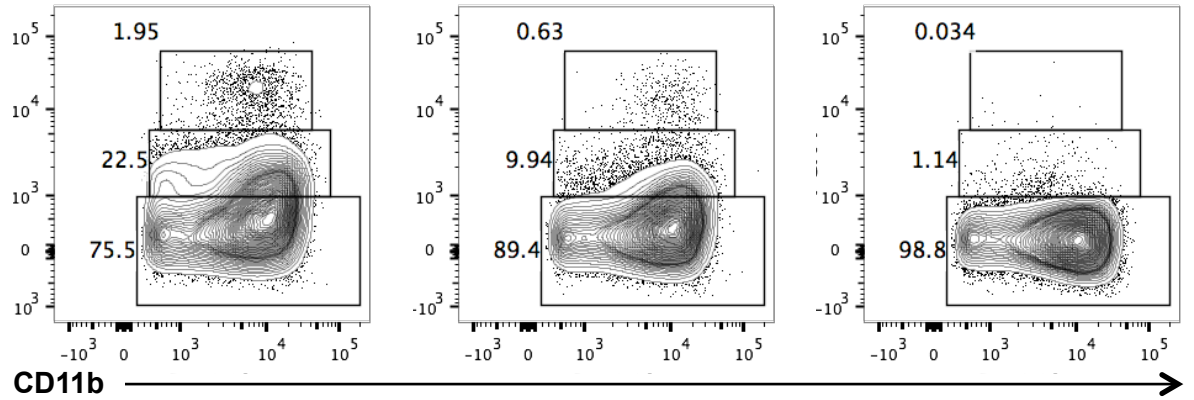

**C.** Live, Single,  
B220<sup>-</sup>, CD11b<sup>+</sup>,  
Ly6G<sup>+</sup>

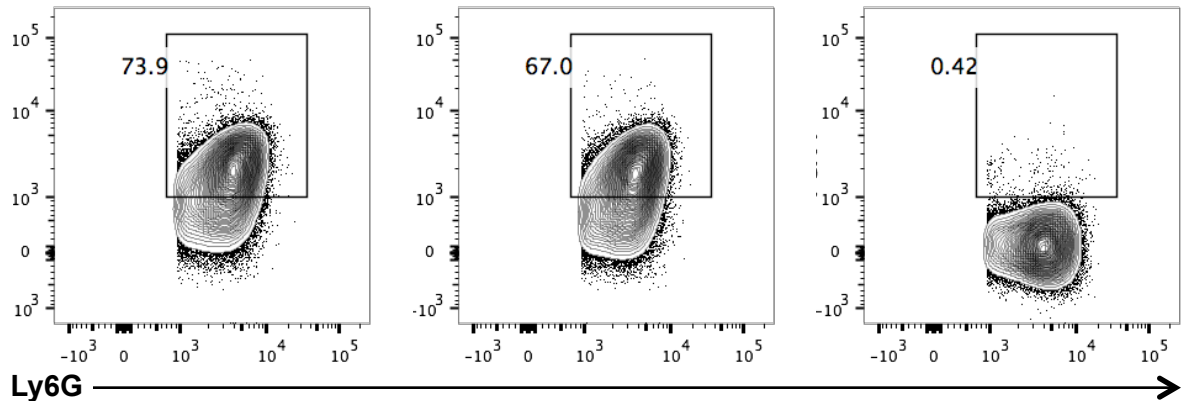

**D.** Live, Single,  
B220<sup>-</sup>, Ly6G<sup>-</sup>,  
CD11c<sup>int/-</sup>, CD11b

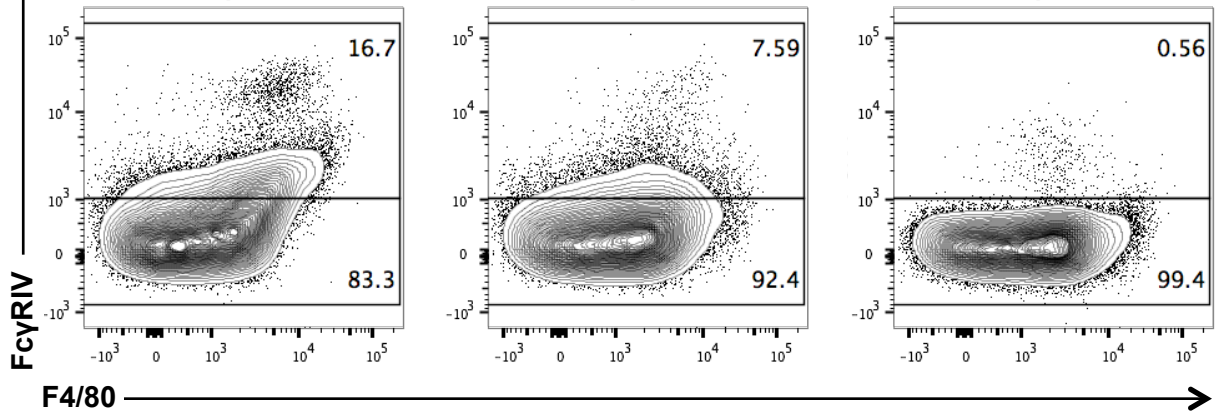

Supplement: NIHMS680327-supplement-3.pdf [file NIHMS680327-supplement-3.pdf]
