# Supplementary material
Source: PubMed Central journal article supplement (PMC4441863)
Supplement: NIHMS680327-supplement-7.pdf [file NIHMS680327-supplement-7.pdf]

**A.****hCD20-Tg Mice  
(Mouse FcγRs)****Blood****Spleen**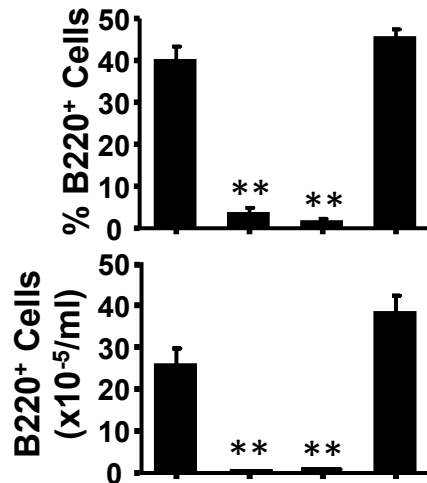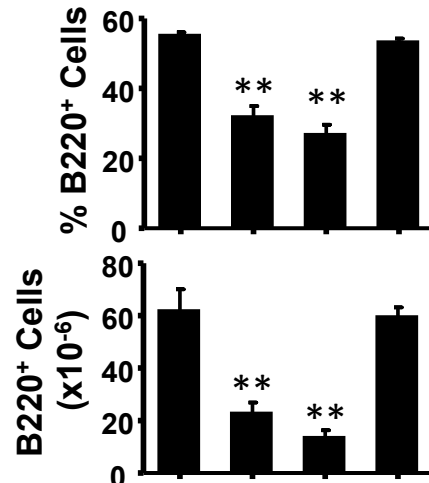

ahCD20 (IgG2a) - + + +  
 Control Liposome - - + -  
 Clodronate Liposome - - - +

**B.****hCD20-Tg  
FcγR-Humanized  
Mice**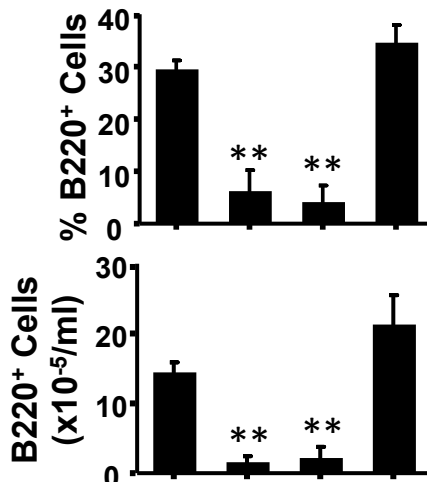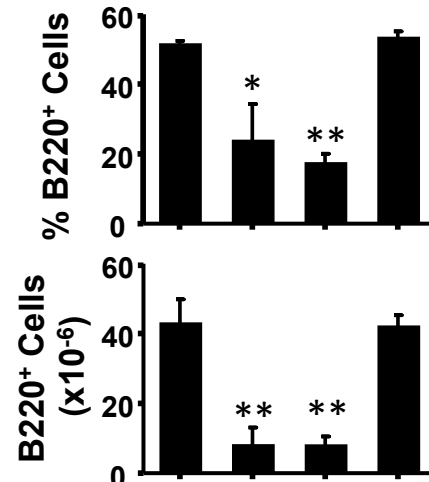

ahCD20 (hIgG1-GASDALIE) - + + +  
 Control Liposome - - + -  
 Clodronate Liposome - - - +

**C.****FcγR-Humanized  
Mice**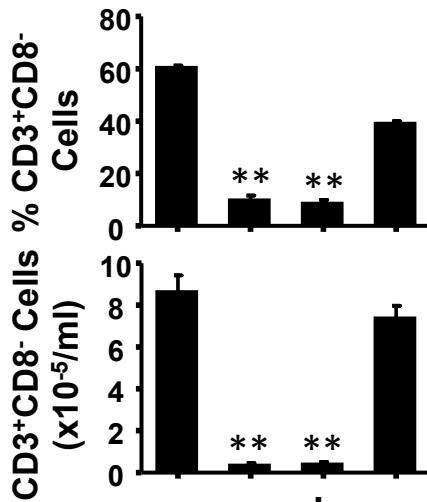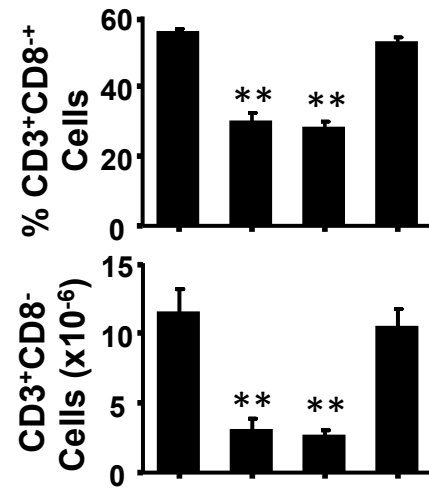

amsCD4 (hIgG1-GASDALIE) - + + +  
 Control Liposome - - + -  
 Clodronate Liposome - - - +
