# Supplementary material
Source: PubMed Central journal article supplement (PMC4441863)

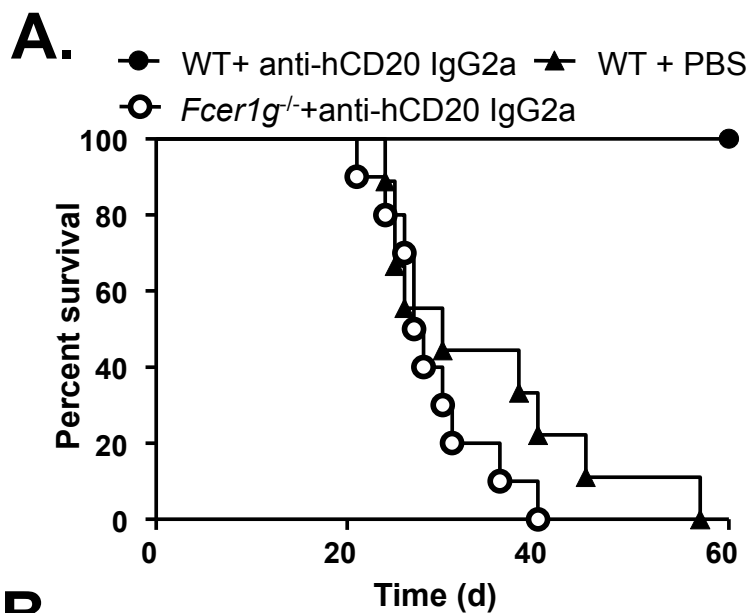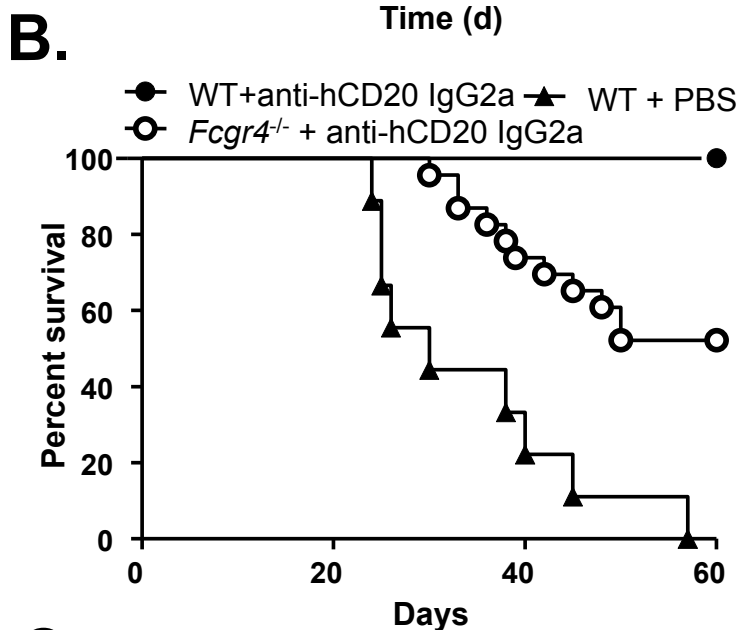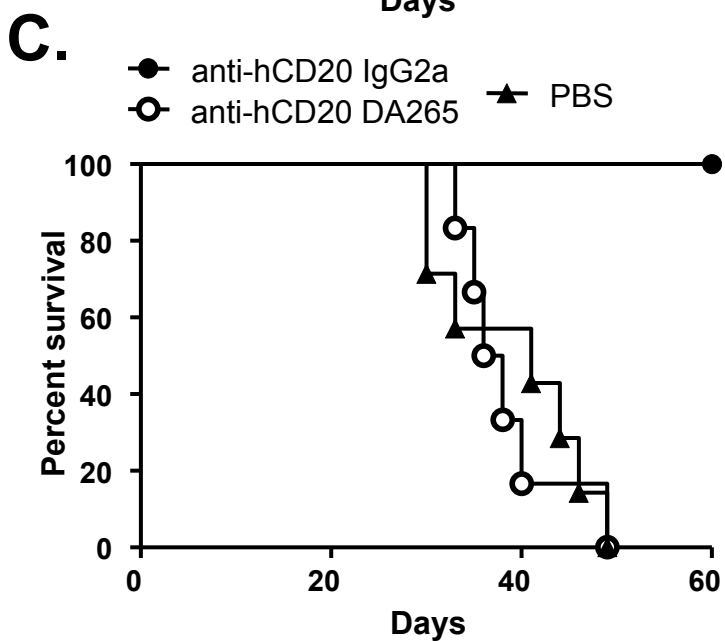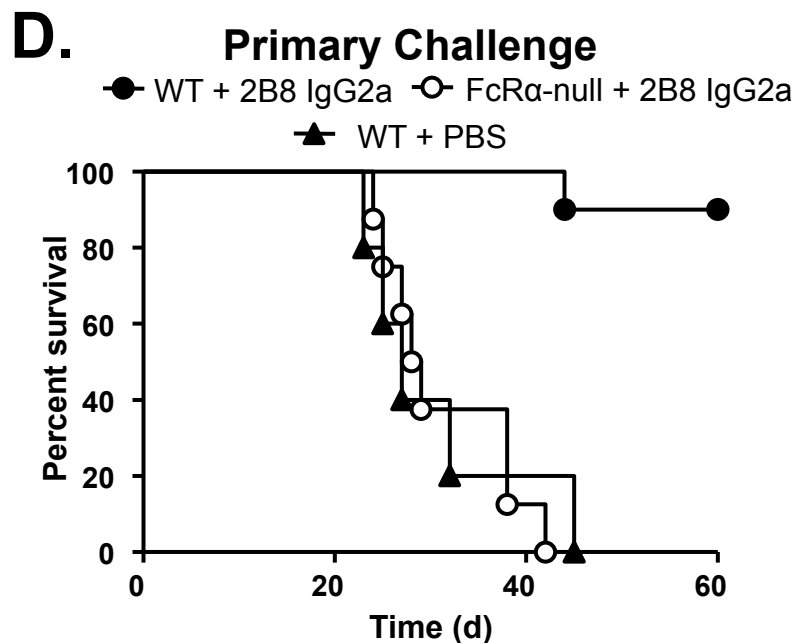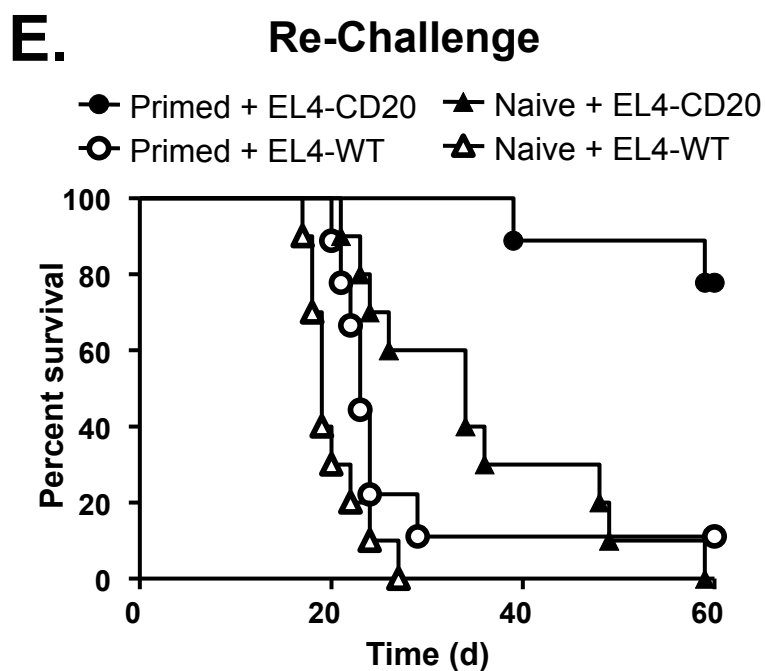

Supplement: NIHMS680327-supplement-1.pdf [file NIHMS680327-supplement-1.pdf]

# Peritoneal Cavity

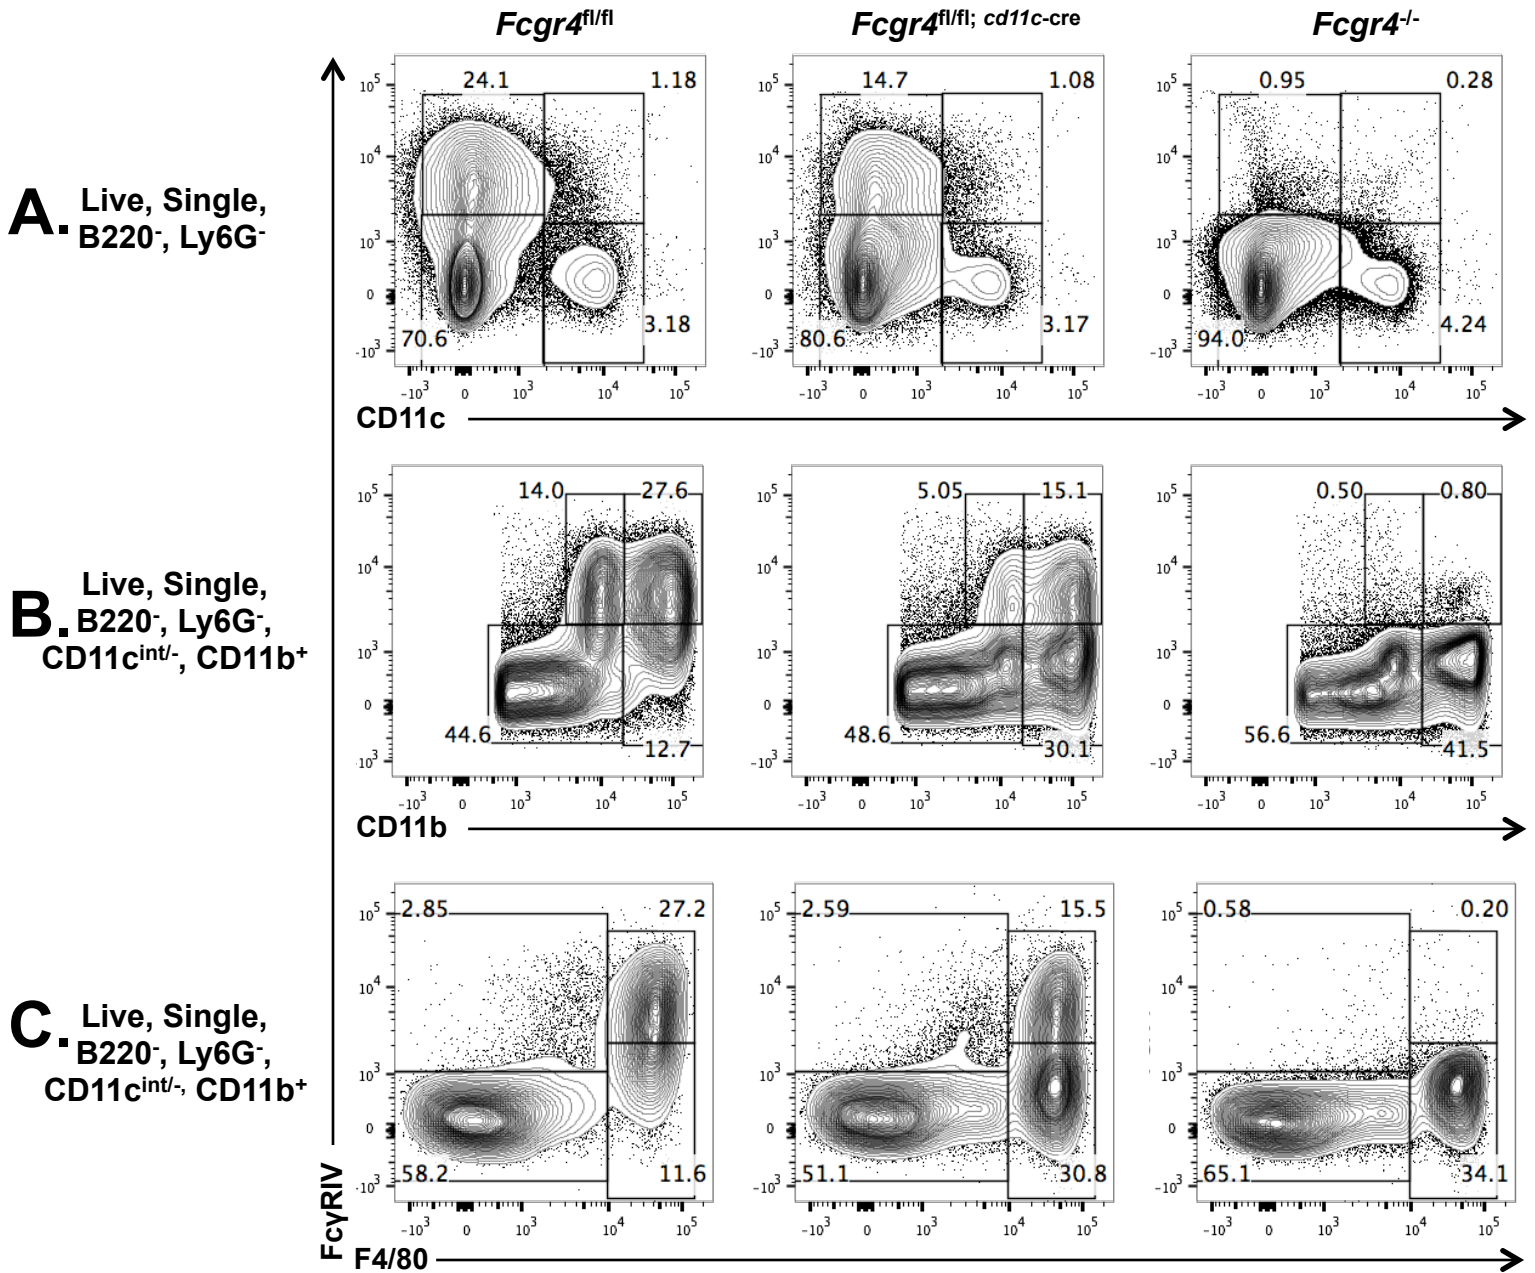

Supplementary Figure 4  
DiLillo and Ravetch

Related to Figure 2

Supplement: NIHMS680327-supplement-4.pdf [file NIHMS680327-supplement-4.pdf]

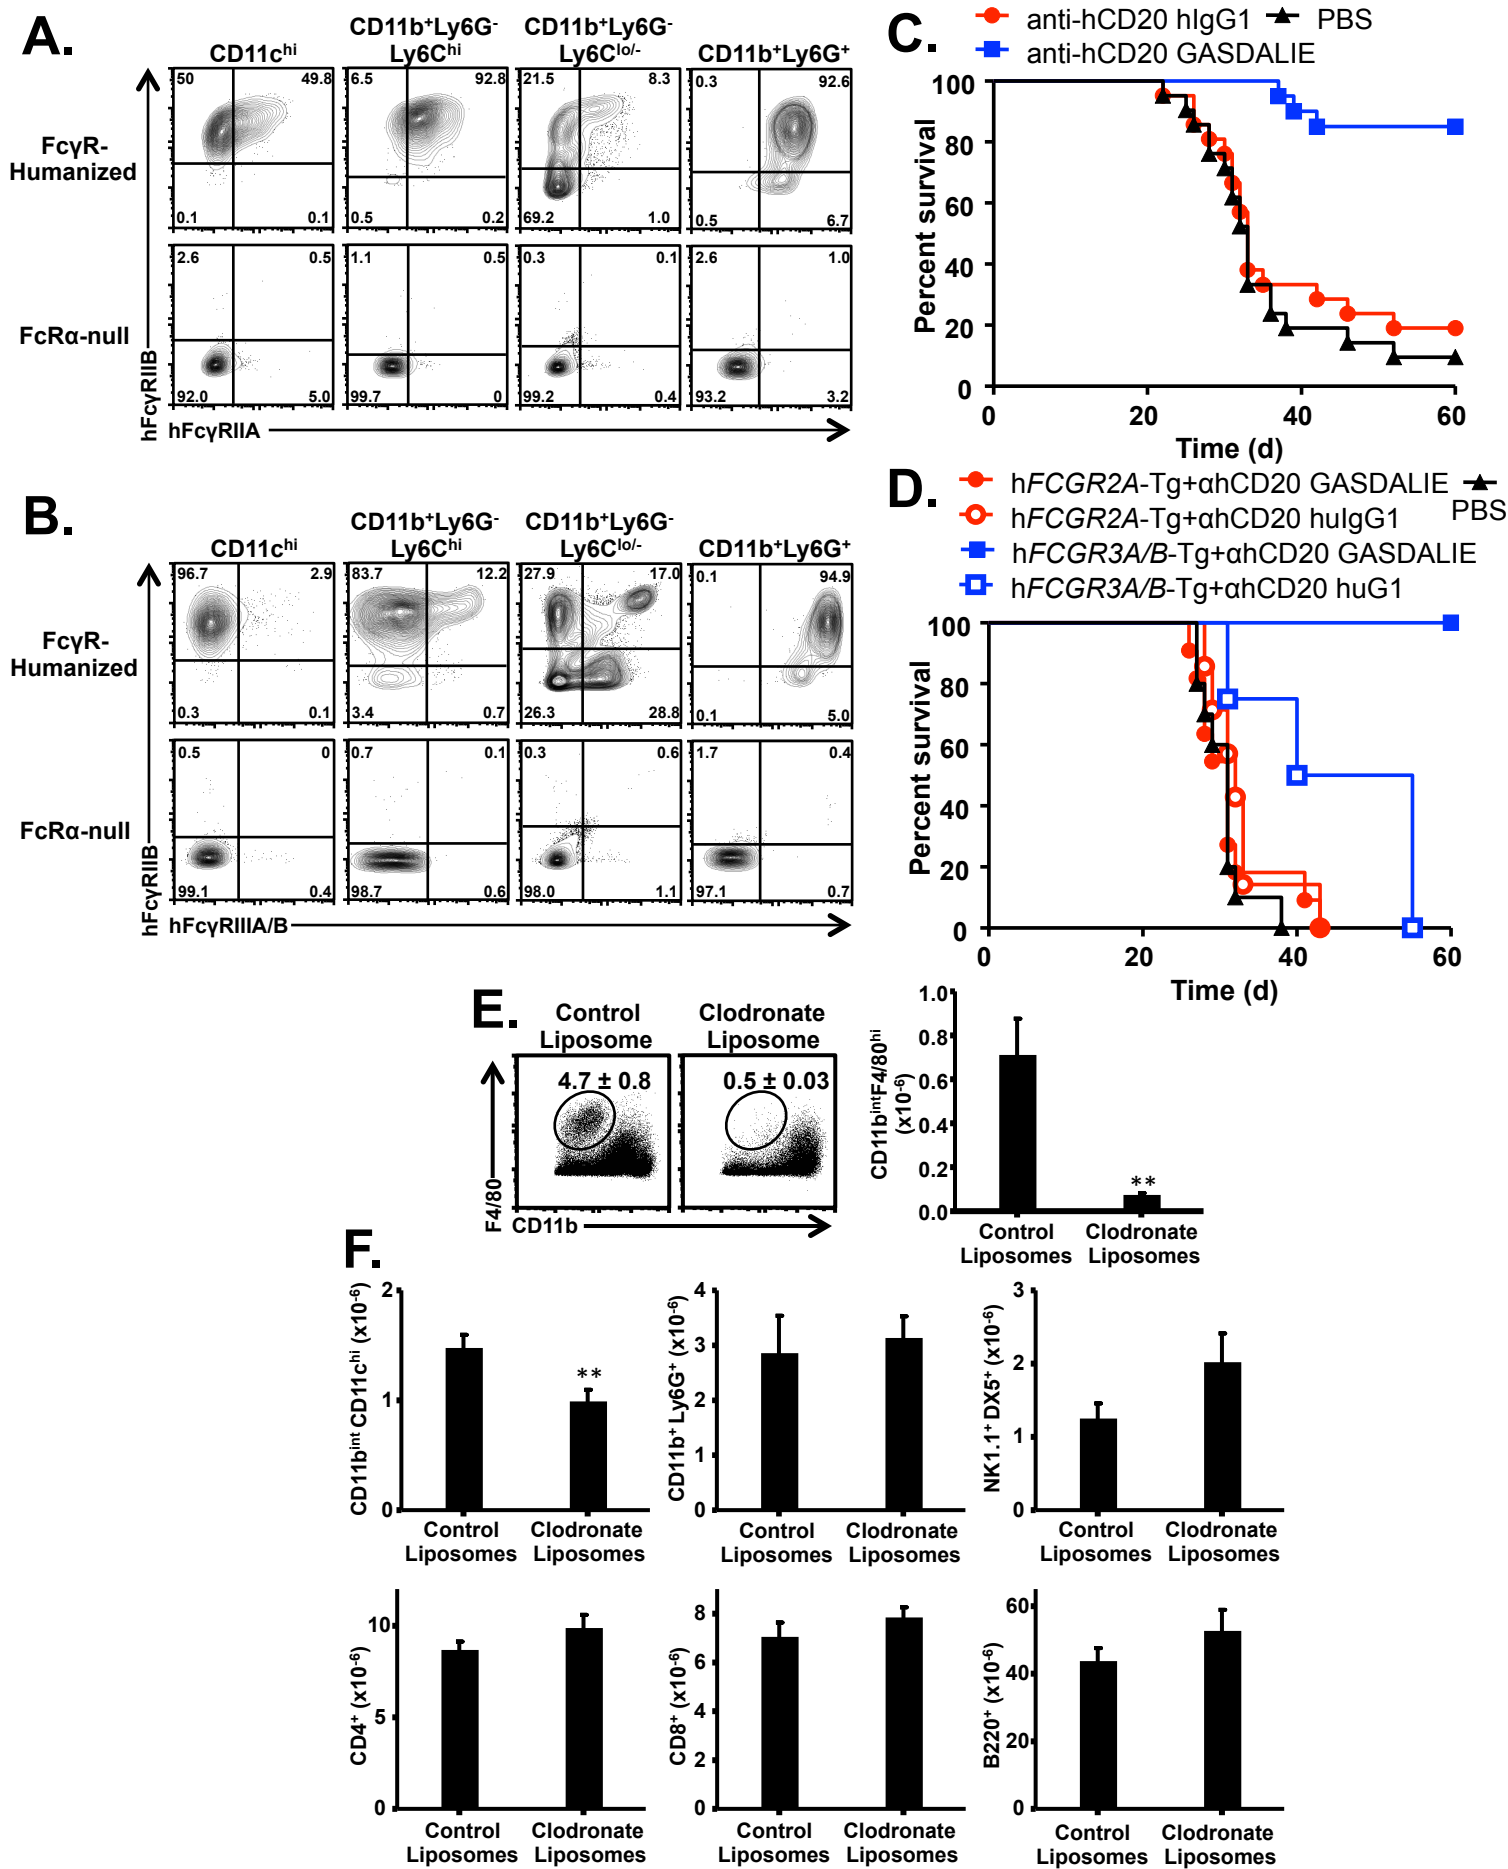

Supplementary Figure 6

DiLillo and Ravetch

Related to Figures 4 & 5

Supplement: NIHMS680327-supplement-6.pdf [file NIHMS680327-supplement-6.pdf]
